# Supplementary material for: Toxicity of Bacillus thuringiensis Strains Derived from the Novel Crystal Protein Cry31Aa with High Nematicidal Activity against Rice Parasitic Nematode Aphelenchoides besseyi
Source: MDPI journal article supplement (doi:10.3390/ijms23158189), 2022-07-25
Supplement: s1 [file s1]

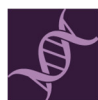

## Supplementary File

# Toxicity of *Bacillus thuringiensis* Strains Derived from the Novel Crystal Protein Cry31Aa with High Nematicidal Activity against Rice Parasitic Nematode *Aphelenchoides besseyi*

Zhao Liang<sup>1, 2†</sup>, Qurban Ali<sup>1, 2†</sup>, Yujie Wang<sup>2</sup>, Guangyuan Mu<sup>3</sup>, Xuefei Kan<sup>3</sup>, Yajun Ren<sup>2</sup>, Hakim Manghwar<sup>4</sup>, Qin Gu<sup>1, 2</sup>, Huijun Wu<sup>1, 2</sup> and Xuewen Gao<sup>1, 2\*</sup>

<sup>1</sup> The Sanya Institute of Nanjing Agricultural University, Sanya 572024, Hainan, China.

<sup>2</sup> Key Laboratory of Integrated Management of Crop Diseases and Pests, Ministry of Education, Department of Plant Pathology, College of Plant Protection, Nanjing Agricultural University, Nanjing 210095, Jiangsu, China; zhaol0619@163.com (Z.L.); 2020202068@stu.njau.edu.cn (Q.A.); yjiewang57@163.com (Y.W.); ren-yajun0719@163.com (Y.R.); guqin@njau.edu.cn (Q.G.); hjwu@njau.edu.cn (H.W.)

<sup>3</sup> Shenzhen Batian Ecotypic Engineering Co., Ltd., Shenzhen 518057, China; muguangyuan1@sina.com (G.M); xavier2014@163.com (X.K.)

<sup>4</sup> Lushan Botanical Garden, Chinese Academy of Sciences, Jiujiang 332000, China; hakim@lsbg.cn (H.M).

\* Correspondence: gaoxw@njau.edu.cn; Tel.: +86-025-8439-5268

† These authors are contributed equally to this study.

**Table S1.** Bacterial strains used in this study.

| Strains | Characteristics                   | Source or reference |
|---------|-----------------------------------|---------------------|
| Top10   | <i>Escherichia coli</i>           | TaKaRa Bio Inc.     |
| BL21    | <i>Escherichia coli</i>           | TaKaRa Bio Inc.     |
| GBAC46  | <i>Bacillus thuringiensis</i>     | This study          |
| NMTD81  | <i>Bacillus thuringiensis</i>     | This study          |
| FZB42   | <i>Bacillus amyloliquefaciens</i> | Stored in the lab   |

**Table S2.** Defense related genes primers used in this study.

| No. | Gene        | Code           | Primer(5'–3')               |
|-----|-------------|----------------|-----------------------------|
| 1   | <i>PR1a</i> | <i>PR1a</i> -F | TCTTCATCACCTGCAACTACTC      |
|     |             | <i>PR1a</i> -R | ATTCATCGGATTTATTCTCACC      |
| 2   | <i>PR4</i>  | <i>PR4</i> -F  | TCTAACGTGCGAGCCACATA        |
|     |             | <i>PR4</i> -R  | CTGGATACACTTGCCACACG        |
| 3   | <i>LOX1</i> | <i>LOX1</i> -F | GCATCCCCAACAGCACATC         |
|     |             | <i>LOX1</i> -R | AATAAAGATTTGGGAGTGACATATTGG |
| 4   | <i>PBZ1</i> | <i>PBZ1</i> -F | CTACTATGGCATGCTCAAGAT       |
|     |             | <i>PBZ1</i> -R | ATAGAAAGGCACATAAACACAA      |
| 5   | <i>PAL1</i> | <i>PAL1</i> -F | ACTACCCGCTGATGACCAAG        |
|     |             | <i>PAL1</i> -R | GCTCTCCTGATCCTGTTGG         |

**Table S3.** Proteins primers used in this study.

| No. | Protein  | Code               | Primer(5'–3')                                             |
|-----|----------|--------------------|-----------------------------------------------------------|
| 1   | Cry31Aa  | <i>cry31Aa</i> -F  | TGCAGGATCCATGACTAAAAACCACAAGAAAATA                        |
|     |          | <i>cry31Aa</i> -R  | CGAAGCTTTCACCTTATCGTCGTCATCCTTGTAATCTTTTTTCGCACCGATAACTT  |
| 2   | Cry40ORF | <i>cry40ORF</i> -F | GCGGGATCCATGTTCACTAATAATGCGAAAA                           |
|     |          | <i>cry40ORF</i> -R | GCGAAGCTTTCACCTTATCGTCGTCATCCTTGTAATCACTAAGCTGAGTAGTTACTC |
| 3   | Cry73Aa  | <i>cry73Aa</i> -F  | TGCAGGATCCATGACCATAACAGTTTATAGATA                         |
|     |          | <i>cry73Aa</i> -R  | CGGGTACCTCACTTATCGTCGTCATCCTTGTAATCATTTATAAATAAACTATTCA   |
